# Supplementary material for: Anti-proliferative and apoptotic effect of cannabinoids on human pancreatic ductal adenocarcinoma xenograft in BALB/c nude mice model
Source: Springer Nature journal article supplement (doi:10.1038/s41598-024-55307-y), 2024-03-18

Supplementary data Fig. 2: The average tumor volume (mm<sup>3</sup>) on day 0 (a) and day 30 (b) over the course of treatment, and percentage of tumor volume change (%) (c) among the NC group, PC group, and treatment groups (THC:CBD at a dose of 1, 5, and 10 mg/kg BW). The values were presented as mean ± SD. <sup>ns</sup>*p* > 0.05 (one-way ANOVA and post hoc test).

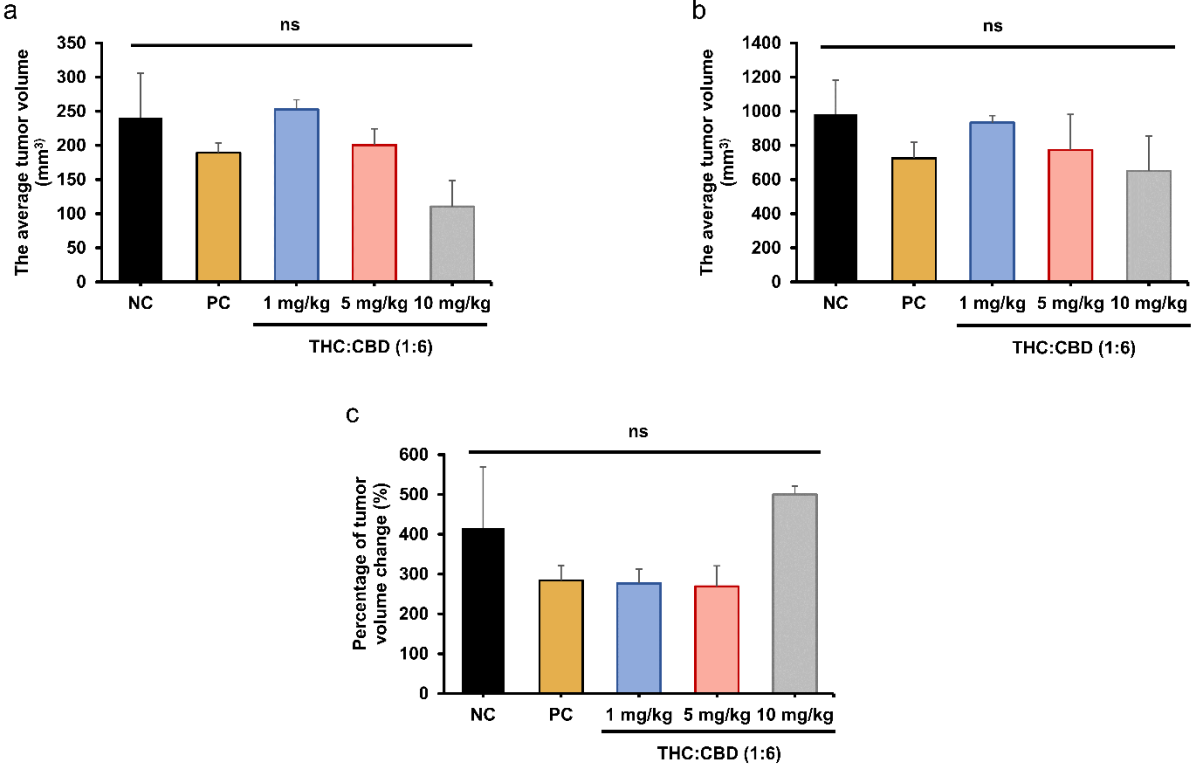

Supplement: MOESM2 [file 41598_2024_55307_MOESM2_ESM.pdf]
